# Supplementary material for: Heterometallic MOFs constructed from thiophene and furandicarboxylate ligands for heavy metal luminescence sensing
Source: Royal Society of Chemistry journal article supplement (doi:10.1039/d0dt04047a), 2021-01-01
Supplement: d0dt04047a1.pdf [file d0dt04047a1.pdf]

## Heterometallic MOFs constructed from thiophene- and furandicarboxylate ligands for heavy metals luminescent sensing

Aleksandr A. Sopianik,<sup>a\*</sup> Marina O. Barsukova,<sup>a</sup> Konstantin A. Kovalenko,<sup>a</sup> Denis G. Samsonenko,<sup>a</sup> Vladimir P. Fedin<sup>a</sup>

<sup>a</sup> *Nikolaev Institute of Inorganic Chemistry SB RAS, Novosibirsk, 630090, Russia*

\* Corresponding author E-mail: [sopianik@niic.nsc.ru](mailto:sopianik@niic.nsc.ru)

|                                                                              |   |
|------------------------------------------------------------------------------|---|
| Additional structure features                                                | 2 |
| Additional structural data for <b>1–3</b> (selected bond lengths and angles) | 3 |
| Photo of luminescence of compound <b>2</b> samples                           | 6 |
| Nitrogen sorption isotherm for <b>2</b> at 77K                               | 6 |
| Thermogravimetric analysis data for <b>1–3</b>                               | 7 |
| IR spectra for <b>1–3</b>                                                    | 8 |

Comment about space group in **3**. Checking the ADDSYM in PLATON finds a higher symmetry and proposes to refine the structure in *Pnma*. We have resolved structure in this group. However, it turned out that the collected X-ray data set correlates significantly worse with this solution compared to the solution in *Pna2<sub>1</sub>* (Final R indices [ $I > 2\sigma(I)$ ] - 0.0918 for *Pnma* versus 0.0365 for *Pna2<sub>1</sub>*). In this case, it is more appropriate to make the solution in *Pna2<sub>1</sub>*.

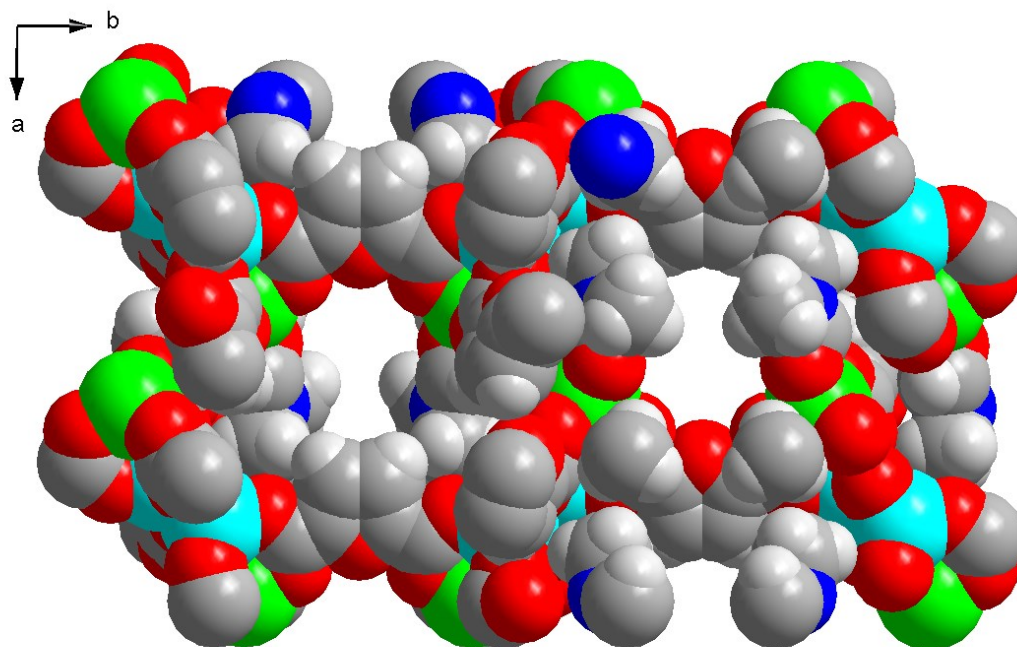

Figure S1. Structure projection of **3** with narrow channels which connect large channels with each other.

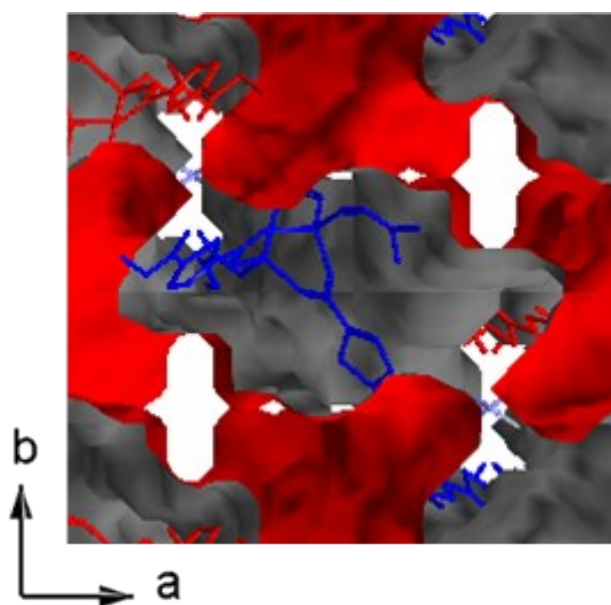

Figure S2. Calculated surface area in **1**.

**Table S1. Selected bond lengths and angles for 1**

| Bond        | <i>d</i> , Å    | Bond        | <i>d</i> , Å    |
|-------------|-----------------|-------------|-----------------|
| Zn1–O12     | 1.935(3)        | Li1–O11     | 1.919(6)        |
| Zn1–O13     | 1.948(3)        | Li1–O14     | 1.909(7)        |
| Zn1–O22     | 1.950(3)        | Li1–O21     | 1.923(7)        |
| Zn1–O24     | 1.964(2)        | Li1–O1D     | 1.910(7)        |
| Angle       | $\omega$ , deg. | Angle       | $\omega$ , deg. |
| O12–Zn1–O13 | 117.79(13)      | O11–Li1–O21 | 107.0(3)        |
| O12–Zn1–O22 | 108.86(12)      | O14–Li1–O11 | 108.9(3)        |
| O12–Zn1–O24 | 98.21(11)       | O14–Li1–O21 | 106.5(3)        |
| O13–Zn1–O22 | 119.38(12)      | O14–Li1–O1D | 112.2(3)        |
| O13–Zn1–O24 | 100.25(11)      | O1D–Li1–O11 | 110.8(3)        |
| O22–Zn1–O24 | 109.36(12)      | O1D–Li1–O21 | 111.2(3)        |

**Table S2. Selected bond lengths and angles for 2**

| Bond         | <i>d</i> , Å    | Bond         | <i>d</i> , Å    |
|--------------|-----------------|--------------|-----------------|
| Zn1–O12      | 1.939(4)        | Li1–O11      | 1.859(11)       |
| Zn1–O21      | 1.934(5)        | Li1–O22      | 1.832(11)       |
| Zn1–O32      | 1.930(4)        | Li1–O31      | 1.919(10)       |
| Zn1–O1D      | 1.979(5)        | Li1–O31      | 1.947(12)       |
| Zn2–O14      | 1.925(4)        | Li2–O13      | 1.909(5)        |
| Zn2–O24      | 1.906(5)        | Li2–O23      | 1.944(6)        |
| Zn2–O33      | 1.927(4)        | Li2–O34      | 1.862(6)        |
| Zn2–O2D      | 1.992(4)        | Li2–O3D      | 1.976(6)        |
| Zn2'–O13     | 1.909(5)        | Li2'–O14     | 1.925(4)        |
| Zn2'–O23     | 1.944(6)        | Li2'–O24     | 1.906(5)        |
| Zn2'–O34     | 1.862(6)        | Li2'–O33     | 1.927(4)        |
| Zn2'–O3D     | 1.976(6)        | Li2'–O2D     | 1.992(4)        |
| Angle        | $\omega$ , deg. | Angle        | $\omega$ , deg. |
| O12–Zn1–O1D  | 97.4(2)         | O11–Li1–O31  | 113.1(6)        |
| O21–Zn1–O12  | 116.1(2)        | O11–Li1–O31  | 115.2(6)        |
| O21–Zn1–O1D  | 101.3(2)        | O22–Li1–O11  | 110.7(6)        |
| O32–Zn1–O12  | 114.5(2)        | O22–Li1–O31  | 109.8(5)        |
| O32–Zn1–O21  | 119.0(2)        | O22–Li1–O31  | 112.8(6)        |
| O32–Zn1–O1D  | 103.8(2)        | O31–Li1–O31  | 94.4(5)         |
| O14–Zn2–O33  | 111.9(2)        | O13–Li2–O23  | 108.9(3)        |
| O14–Zn2–O2D  | 99.02(19)       | O13–Li2–O3D  | 107.1(3)        |
| O24–Zn2–O14  | 114.9(2)        | O23–Li2–O3D  | 108.8(3)        |
| O24–Zn2–O33  | 120.3(2)        | O34–Li2–O13  | 109.1(3)        |
| O24–Zn2–O2D  | 99.92(19)       | O34–Li2–O23  | 117.0(3)        |
| O33–Zn2–O2D  | 107.34(18)      | O34–Li2–O3D  | 105.6(3)        |
| O13–Zn2'–O23 | 108.9(3)        | O14–Li2'–O33 | 111.9(2)        |
| O13–Zn2'–O3D | 107.1(3)        | O14–Li2'–O2D | 99.02(19)       |
| O23–Zn2'–O3D | 108.8(3)        | O24–Li2'–O14 | 114.9(2)        |
| O34–Zn2'–O13 | 109.1(3)        | O24–Li2'–O33 | 120.3(2)        |
| O34–Zn2'–O23 | 117.0(3)        | O24–Li2'–O2D | 99.92(19)       |
| O34–Zn2'–O3D | 105.6(3)        | O33–Li2'–O2D | 107.34(18)      |

**Table S3. Selected bond lengths and angles for 3**

| Bond         | <i>d</i> , Å    | Bond        | <i>d</i> , Å    |
|--------------|-----------------|-------------|-----------------|
| Li1–O12      | 1.871(11)       | Zn1–O11     | 1.944(4)        |
| Li1–O15      | 1.936(11)       | Zn1–O22     | 1.939(5)        |
| Li1–O21      | 1.957(13)       | Zn1–O34     | 1.941(4)        |
| Li1–O35      | 1.89(2)         | Zn1–O1D     | 1.985(4)        |
| Li1–O35'     | 1.88(2)         | Zn2–O14     | 1.921(4)        |
| Li2–O15      | 1.928(12)       | Zn2–O25     | 1.960(5)        |
| Li2–O21      | 1.931(11)       | Zn2–O32     | 1.946(4)        |
| Li2–O24      | 1.875(11)       | Zn2–O2D     | 1.989(4)        |
| Li2–O31      | 1.844(18)       |             |                 |
| Li2–O31'     | 2.01(2)         |             |                 |
| Angle        | $\omega$ , deg. | Angle       | $\omega$ , deg. |
| O12–Li1–O15  | 116.2(6)        | O11–Zn1–O1D | 97.13(19)       |
| O12–Li1–O211 | 12.3(6)         | O22–Zn1–O11 | 126.7(2)        |
| O12–Li1–O35  | 105.4(7)        | O22–Zn1–O34 | 111.28(19)      |
| O12–Li1–O35' | 113.2(7)        | O22–Zn1–O1D | 101.86(19)      |
| O15–Li1–O21  | 91.8(5)         | O34–Zn1–O11 | 112.79(19)      |
| O35–Li1–O15  | 121.0(8)        | O34–Zn1–O1D | 101.8(2)        |
| O35–Li1–O21  | 109.6(7)        | O14–Zn2–O25 | 127.0(2)        |
| O35'–Li1–O21 | 96.4(7)         | O14–Zn2–O32 | 111.69(18)      |
| O15–Li2–O21  | 92.8(5)         | O14–Zn2–O2D | 102.78(19)      |
| O15–Li2–O31' | 97.4(7)         | O25–Zn2–O2D | 97.91(19)       |
| O21–Li2–O31' | 119.0(6)        | O32–Zn2–O25 | 110.9(2)        |
| O24–Li2–O15  | 112.9(5)        | O32–Zn2–O2D | 101.73(19)      |
| O24–Li2–O21  | 114.4(7)        |             |                 |
| O24–Li2–O31' | 115.9(6)        |             |                 |
| O31–Li2–O15  | 111.0(8)        |             |                 |
| O31–Li2–O21  | 119.2(7)        |             |                 |
| O31–Li2–O24  | 106.2(6)        |             |                 |

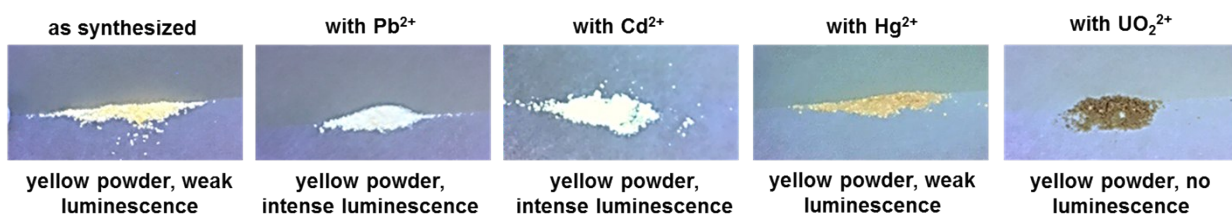

Figure S3. Differences in emission of **2** and its inclusion compounds. 365 nm excitation lamp.

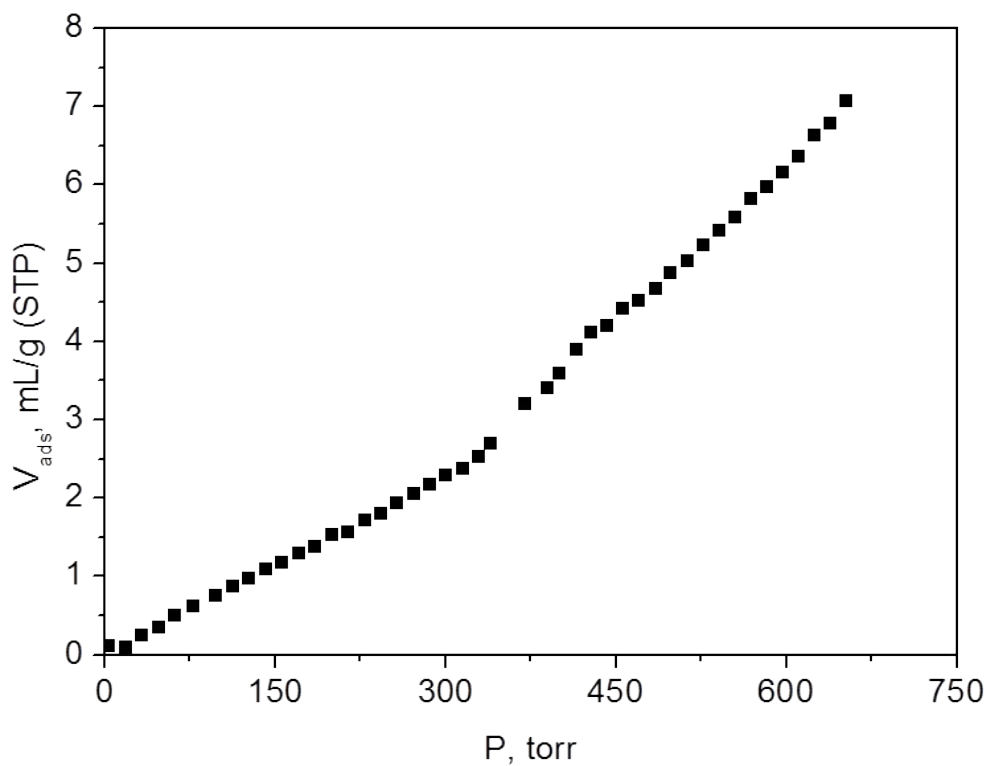

Figure S4. Nitrogen adsorption curve for activated **2** at 77K.

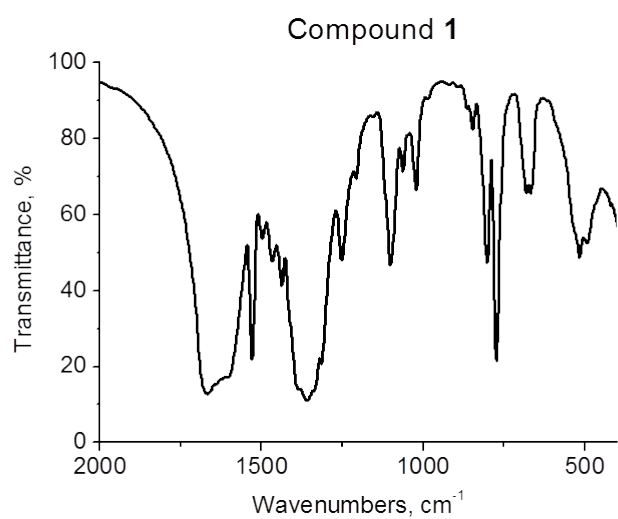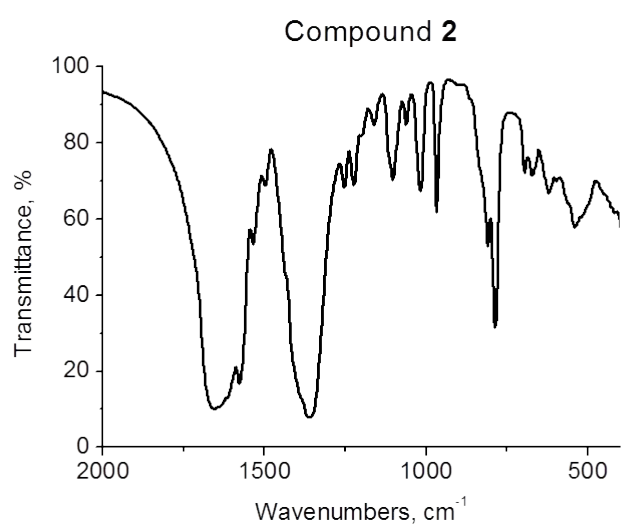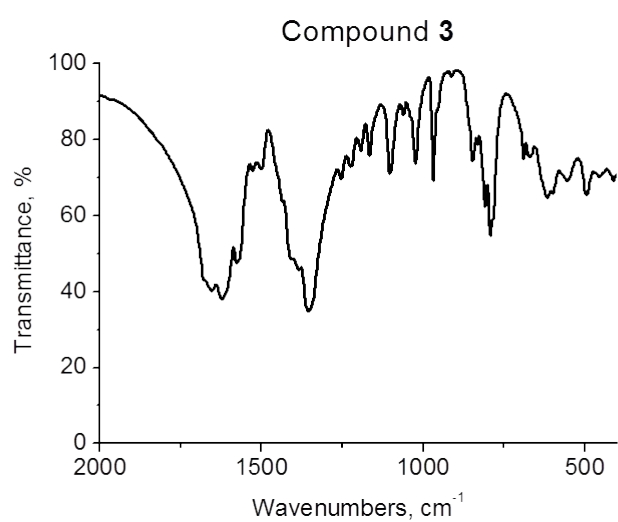

Figure S4. FT-IR spectra of **1-3**.

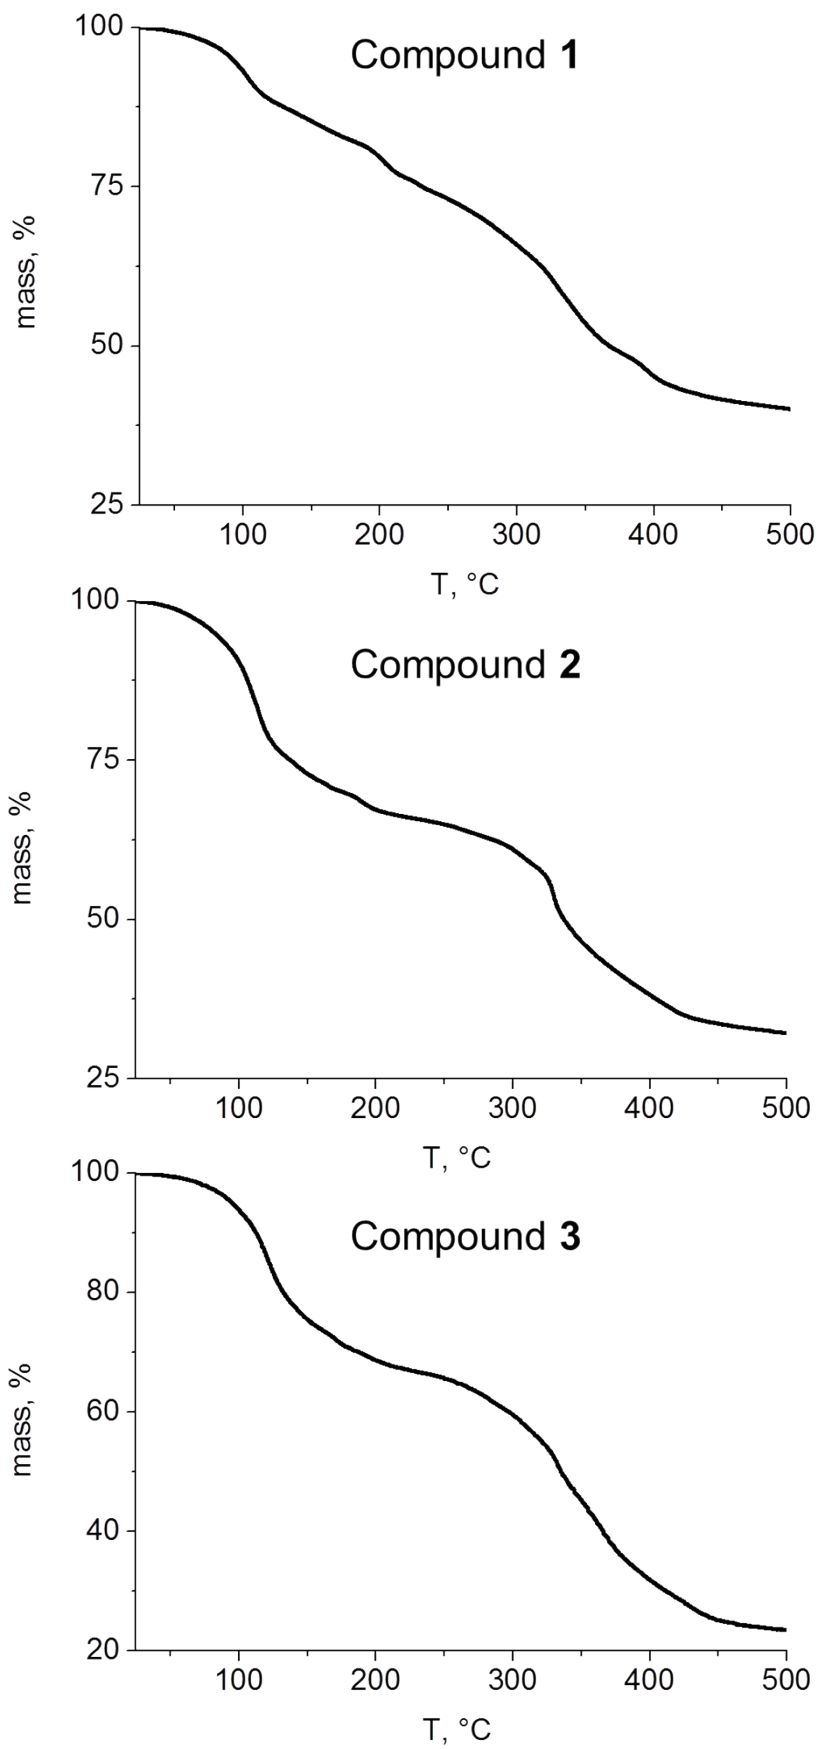

Figure S5. TGA plots for 1–3.
